# Supplementary material for: Evaluating an Abbreviated Version of the Circumplex Team Scan Inventory of Within-Team Interpersonal Norms
Source: Atypon-hosted journal article supplement (doi:10.1027/1015-5759/a000752), 2022-12-16
Supplement: 1015-5759_a000752_esm1.pdf [file 1015-5759_a000752_esm1.pdf]

## Section 1 – Climate Scale Items and Climate and Personality Scale Reliabilities

### Inclusion

#### Samples 1 and 2

- My team has treated me like an insider.
- My team has cared about me.
- My team has given me the feeling that i belong.
- My team has appreciated me.
- My team has allowed me to present myself the way that i am.
- My team has encouraged me to be who i am.

#### Sample 3

- My team gave me the feeling that I belong.
- My team appreciated me.
- My team allowed me to present myself the way that I am.
- My team encouraged me to be who I am.
- My team treated me like an insider.
- My team encouraged me to be authentic.
- My team liked me.
- My team allowed me to be who I am.

### Psychological Safety

*Note.* Sample 3 used the full scale. Samples 1-2 used only the three items that seemed most essential to defining psychological safety.

#### Samples 1 and 2

- Members of this team were able to bring up problems and tough issues.
- It has been safe to take risks on this team.
- It has been difficult to ask other members of this team for help. **(Rev)**

#### Sample 3

- If you made a mistake on this team, it was often held against you. **(Rev)**
- Members of this team were able to bring up problems and tough issues.
- People on this team sometimes rejected others for being different. **(Rev)**
- It was safe to take risks on this team.
- It was difficult to ask other members of this team for help. **(Rev)**
- No one on this team would deliberately act in a way that undermined my efforts.
- Working with members of this team, my unique skills and talents were valued and utilized.

**Justice**Samples 1 and 2

- Some people on the team failed to do their share of the work.
- We expressed our views and feelings about the way decisions are made in the team
- The way we made decisions is free from personal bias
- When discussing procedures, we did not always account for the views of different people in the team **(rev)**
- In general, we thoroughly explained our thinking to each other.
- When we needed to explain something to each other, we did so by providing reasons and arguments.
- Teammates treated each other with respect
- Teammates refrained from improper remarks and comments.

Sample 3

- Some people on the team failed to do their share of the work. **(Rev)**
- Duties and obligations were shared fairly among team members.
- We expressed our views and feelings about the way decisions were made in the team.
- When discussing procedures, we did not always take into account the views of the different people in the team. **(Rev)**
- When discussing procedures, we used accurate and precise information.
- The decisions we made as a team were coherent and always followed the same criteria.
- We debated the issues that affect us.
- We put each other down. **(Rev)**
- We helped each other out.
- We treated each other with respect.
- We refrained from improper remarks and comments.
- Within the team, we communicated with each other in a respectful manner.
- In general, we thoroughly explained the team procedures we use to each other.
- When we needed to explain something within the team, we did it in a timely manner and by providing details.
- Within the team, we tailored communications based on the specific needs of each member.

## Supplemental Table 1

*Climate and Personality Scale Reliabilities (McDonald's ws)*

| Sample | Inclusion | Safety | Justice | Extraversion | Alienation |
|--------|-----------|--------|---------|--------------|------------|
| 1      | .97       | .64    | .86     | .88          | .83        |
| 2      | .96       | .62    | .81     | .86          | .78        |
| 3      | .95       | .81    | .90     | .84          | .76        |

**Section 2 - Correlations between Teams' Average CTS and Average Personality or Climate Ratings**

Supplemental Table 2

*Correlations between Teams' CTS-16 and Personality or Climate Ratings*

| CTS Item        | Inclusion | Safety | Justice | Extraversion | Alienation |
|-----------------|-----------|--------|---------|--------------|------------|
| A - Pushy       | .29       | .15    | .29     | .13          | -.02       |
| B - Competitive | -.24      | -.36   | -.23    | -.06         | .26        |
| C - Combative   | -.54      | -.57   | -.55    | -.15         | .27        |
| D - Rude        | -.54      | -.62   | -.62    | -.09         | .25        |
| E - Guarded     | -.65      | -.64   | -.73    | -.11         | .20        |
| F - Evasive     | -.43      | -.50   | -.56    | -.20         | .22        |
| G - Hesitant    | -.45      | -.51   | -.60    | -.32         | .16        |
| H - Timid       | -.50      | -.50   | -.60    | -.29         | .15        |
| I - Cautious    | -.05      | -.08   | -.10    | -.15         | .04        |
| J - Yielding    | -.06      | -.09   | -.03    | -.22         | .11        |
| K - Modest      | .27       | .27    | .31     | -.08         | .01        |
| L - Respectful  | .73       | .69    | .76     | .18          | -.15       |
| M - Open        | .71       | .60    | .68     | .23          | -.12       |
| N - Engaged     | .67       | .72    | .77     | .23          | -.22       |
| O - Confident   | .58       | .56    | .68     | .24          | -.12       |
| P - Courageous  | .37       | .39    | .46     | .24          | -.05       |

*Note.*  $N = 139$  Teams. Correlations  $> .17$  are significant at  $p < .05$  (uncorrected).

**Section 3 - Correlations between Individuals' Team-Centered CTS Personality or Climate Ratings**

Supplemental Table 3

*Correlations between Individuals' Team-Centered CTS-16 and Personality or Climate Ratings*

| CTS Item        | Inclusion | Safety | Justice | Extraversion | Alienation |
|-----------------|-----------|--------|---------|--------------|------------|
| A - Pushy       | .09       | -.12   | .04     | .09          | .07        |
| B - Competitive | -.22      | -.34   | -.22    | -.04         | .09        |
| C - Combative   | -.22      | -.37   | -.27    | -.04         | .14        |
| D - Rude        | -.28      | -.34   | -.43    | -.07         | .19        |
| E - Guarded     | -.40      | -.42   | -.43    | -.06         | .20        |
| F - Evasive     | -.18      | -.33   | -.34    | -.17         | .14        |
| G - Hesitant    | -.23      | -.40   | -.48    | -.08         | .11        |
| H - Timid       | -.18      | -.28   | -.36    | -.07         | .14        |
| I - Cautious    | -.04      | -.06   | .01     | -.14         | .03        |
| J - Yielding    | .00       | .02    | .04     | -.08         | .06        |
| K - Modest      | .13       | .15    | .17     | -.08         | -.01       |
| L - Respectful  | .30       | .35    | .42     | .02          | -.13       |
| M - Open        | .48       | .45    | .48     | -.01         | -.07       |
| N - Engaged     | .40       | .44    | .52     | .07          | -.15       |
| O - Confident   | .34       | .39    | .48     | .12          | -.06       |
| P - Courageous  | .24       | .21    | .29     | .12          | -.01       |

*Note.*  $N_s = 446$  (for Inclusion, Safety, and Justice) or  $442$  (for Extraversion and Alienation). Correlations  $> .09$  are significant at  $p < .05$  (uncorrected).

**Section 4 - Correlations between Individuals' CTS Ratings and their Teammates' Personality or Team Climate Ratings**

Supplemental Table 4

*Correlations between Individuals' CTS-16 and Teammates' Personality or Climate Ratings*

| CTS Item        | Inclusion | Safety | Justice | Extraversion | Alienation |
|-----------------|-----------|--------|---------|--------------|------------|
| A - Pushy       | .10       | .13    | .12     | .01          | -.02       |
| B - Competitive | -.08      | -.06   | -.10    | -.03         | .10        |
| C - Combative   | -.22      | -.17   | -.24    | -.08         | .06        |
| D - Rude        | -.20      | -.21   | -.22    | -.04         | .01        |
| E - Guarded     | -.27      | -.23   | -.34    | -.09         | .03        |
| F - Evasive     | -.21      | -.20   | -.25    | -.05         | .05        |
| G - Hesitant    | -.26      | -.21   | -.28    | -.18         | .04        |
| H - Timid       | -.26      | -.21   | -.25    | -.17         | .01        |
| I - Cautious    | -.05      | -.04   | -.07    | -.02         | .01        |
| J - Yielding    | -.08      | -.08   | -.06    | -.06         | .05        |
| K - Modest      | .03       | .03    | .07     | .02          | .04        |
| L - Respectful  | .31       | .26    | .33     | .10          | .01        |
| M - Open        | .26       | .23    | .31     | .14          | -.02       |
| N - Engaged     | .32       | .31    | .37     | .12          | -.04       |
| O - Confident   | .25       | .22    | .30     | .10          | -.03       |
| P - Courageous  | .15       | .18    | .22     | .08          | -.01       |

*Note.*  $N_s = 446$  for Inclusion and Justice, 444 for Safety, and 441 for Extraversion and Alienation. Correlations  $> .09$  are significant at  $p < .05$  (uncorrected).

**Section 5 – Comparing Results for Samples 1-2 versus Sample 3**

Whereas Samples 1-2 administered the same items to students from the same engineering course, Sample 3 administered somewhat different items to students from a different engineering course. To check if those differences affected the results, for each association reported in Table 3, Supplemental Table 5 compares that association in Sample 3 with the corresponding association in Samples 1-2. All *CIs* included zero, indicating no significant differences between samples.

Supplemental Table 5

*Tests of Differences between Sample 3 and Samples 1-2 in Summary Parameters for Relations between CTS-16 and Personality or Climate Ratings*

| Measure                                                             | Communal Vector [ <i>CI</i> ] | Agentic Vector [ <i>CI</i> ] | Overall Vector Angle [ <i>CI</i> ] | Amplitude [ <i>CI</i> ] |
|---------------------------------------------------------------------|-------------------------------|------------------------------|------------------------------------|-------------------------|
| teams' average CTS ↔ teams' personality or climate ratings          |                               |                              |                                    |                         |
| Inclusion                                                           | 0.06 [-0.12,0.25]             | -0.07 [-0.25,0.13]           | -7.4 [-21.7,9.1]                   | 0.03 [-0.16,0.22]       |
| Safety                                                              | -0.02 [-0.17,0.13]            | -0.11 [-0.29,0.09]           | -7.4 [-21.7,6.9]                   | -0.06 [-0.23,0.11]      |
| Justice                                                             | 0.06 [-0.07,0.19]             | 0.02 [-0.16,0.22]            | -0.4 [-13.7,15.6]                  | 0.06 [-0.06,0.22]       |
| Extraversion                                                        | -0.20 [-0.47,0.07]            | -0.08 [-0.30,0.14]           | 19.90 [-26.3,84.8]                 | -0.19 [-0.45,0.10]      |
| Alienation                                                          | -0.08 [-0.36,0.21]            | 0.01 [-0.23,0.24]            | -11.9 [-138.5,136.7]               | 0.08 [-0.23,0.29]       |
| individuals' CTS ↔ individuals' personality or team climate ratings |                               |                              |                                    |                         |
| Inclusion                                                           | 0.09 [-0.06,0.24]             | 0.02 [-0.11,0.18]            | -2.2 [-15.8,14.5]                  | 0.09 [-0.07,0.25]       |
| Safety                                                              | 0.10 [-0.02,0.22]             | -0.02 [-0.14,0.10]           | -5.6 [-16.5,6.8]                   | 0.09 [-0.04,0.21]       |
| Justice                                                             | 0.10 [-0.00,0.20]             | 0.05 [-0.07,0.17]            | 0.2 [-9.8,11.0]                    | 0.11 [0.00,0.22]        |
| Extraversion                                                        | -0.11 [-0.25,0.04]            | 0.02 [-0.09,0.14]            | 31.70 [-4.5,74.8]                  | -0.05 [-0.18,0.10]      |
| Alienation                                                          | -0.08 [-0.24,0.07]            | -0.04 [-0.15,0.05]           | 7.3 [-48.2,76.9]                   | 0.09 [-0.06,0.23]       |
| individuals' CTS ↔ teammates' personality or climate ratings        |                               |                              |                                    |                         |
| Inclusion                                                           | 0.1 [-0.02,0.23]              | -0.03 [-0.13,0.07]           | -16.2 [-36.9,2.3]                  | 0.07 [-0.06,0.20]       |
| Safety                                                              | -0.02 [-0.16,0.11]            | -0.08 [-0.19,0.02]           | -12.2 [-35.6,9.2]                  | -0.06 [-0.20,0.07]      |
| Justice                                                             | 0.09 [-0.03,0.21]             | 0 [-0.11,0.09]               | -8.6 [-24.7,7.7]                   | 0.08 [-0.05,0.20]       |
| Extraversion                                                        | -0.04 [-0.16,0.10]            | -0.06 [-0.17,0.05]           | -10.50 [-86.6,63.1]                | -0.06 [-0.19,0.08]      |
| Alienation                                                          | -0.02 [-0.15,0.12]            | 0 [-0.10,0.12]               | -29.1 [-169.4,170.8]               | 0.01 [-0.10,0.09]       |

*Note.* CTS = Circumplex Team Scan. Values show how Sample 3 compares to Samples 1-2. *CI* = 95% confidence intervals for differences in structural summary parameters as computed by the *circumplex* package for R (Girard, Zimmerman, & Wright, 2018).

**References**

Girard, J. M., Zimmermann, J., & Wright, A. G. (2018, June). *New tools for circumplex data analysis and visualization in R*. Paper presented at the meeting of the *Society for Interpersonal Theory and Research*, Montreal, Canada.
